# Supplementary material
Source: PubMed Central journal article supplement (PMC3669783)
Supplement: 97320630009329S1.pdf [file 97320630009329S1.pdf]

## Supplementary material:

**Table 1:** Sequence identity (%) matrix of HSP90 homolog for all aligned regions

|   |         |         |         |         |         |
|---|---------|---------|---------|---------|---------|
| 1 | 100.000 | 68.063  | 63.874  | 66.492  | 61.780  |
| 2 | 68.063  | 100.000 | 65.183  | 64.921  | 62.565  |
| 3 | 63.874  | 65.183  | 100.000 | 64.660  | 79.581  |
| 4 | 66.492  | 64.921  | 64.660  | 100.000 | 65.969  |
| 5 | 61.780  | 62.565  | 79.581  | 64.969  | 100.000 |

**Table 2:** RMSD (Å) matrix for the superimposed structures of HSP90 homolog for all aligned regions

|   |       |       |       |       |       |
|---|-------|-------|-------|-------|-------|
| 1 | 0.000 | 1.701 | 1.805 | 2.100 | 2.046 |
| 2 | 1.701 | 0.000 | 0.861 | 1.828 | 1.674 |
| 3 | 1.805 | 0.861 | 0.000 | 1.937 | 1.761 |
| 4 | 2.100 | 1.828 | 1.937 | 0.000 | 1.003 |
| 5 | 2.046 | 1.674 | 1.761 | 1.003 | 0.000 |

1: *Homo sapiens*; 2: *Entamoeba histolytica*; 3: *Trypanosoma brucei*; 4: *Leishmania donovani*; 5: *Plasmodium falciparum*

**Table 3:** Analogs of Geldanamycin

| GA-Analog 1                                                                                                                                         | GA-Analog 2                                                                                                                                           |
|-----------------------------------------------------------------------------------------------------------------------------------------------------|-------------------------------------------------------------------------------------------------------------------------------------------------------|
| 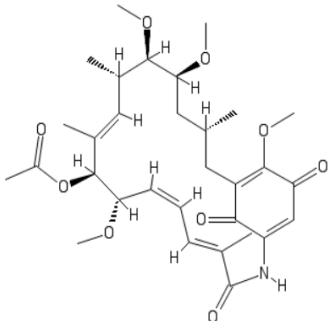                                                                   |                                                                    |
| <chem>O([C@H]1C[C@@H](CC2=C(OC)C(=O)C=C(N(C(=O)\C(=C(\C(=C/[C@H](OC)[C@@H](OC(=O)C)/C(=C/[C@H]([C@H]1O)C)C)[H])C)[H])[H])C)C(=O)[H])C2=O)C)C</chem> | <chem>O([C@H]1C[C@@H](CC2=C(OC)C(=O)C=C(N(C(=O)\C(=C(\C(=C/[C@H](OC)[C@@H](OCC)/C(=C/[C@H]([C@H]1O)[H])C)[H])C)[H])[H])C)C(=O)[H])C2=O)[H])C)C</chem> |

**Table 4:** Binding affinity (kcal/mol) of analogs of Geldanamycin and HSP90 homologs

| Target        | GA    | Analog1 | Analog2 |
|---------------|-------|---------|---------|
| Human         | -4.68 | -4.33   | -4.86   |
| Plasmodium    | -5.09 | -5.23   | -5.08   |
| Leishmania    | -4.57 | -4.76   | -4.82   |
| Trypanosoma   | -5.42 | -4.50   | -5.08   |
| E.Histolytica | -4.76 | -4.54   | -7.15   |

**Table 5:** Drug likeliness properties of analogs of Geldanamycin

| DRUG         | Mol.wt. | H-bond donor | H-bond acceptor | LogP  | Molar refractivity |
|--------------|---------|--------------|-----------------|-------|--------------------|
| Geldanamycin | 560.00  | 4            | 9               | 1.803 | 146.247            |
| Analog1      | 573.00  | 1            | 9               | 3.565 | 152.524            |
| Analog2      | 531.00  | 2            | 7               | 4.205 | 147.204            |

**Table 6:** Interaction analysis of docked structure of HSP90 with Geldanamycin and its analogs

| HSP90 species | Geldanamycin (Residues involved in close contact)           | Analog1 (Residues involved in close contact)    | Analog2 (Residues involved in close contact)                |
|---------------|-------------------------------------------------------------|-------------------------------------------------|-------------------------------------------------------------|
| Human         | I426, H450, P423, W431, D424, K449, N428, T427, I428        | S627, Q623, A628, R734, G797, L794, S795        | I647, E475, L 569, W650, N476                               |
| Plasmodium    | L560, W512, K 565, C562, Q550, K553, F623, K561, E566, Q622 | K462, F 363, A366, N463, M370, N402, E459, F460 | K561, K563, E550, F623, K565, L560, E622, G624              |
| Trypanosoma   | E510, K509, T429, K 432, S428, R431                         | E512, E510, K509, K432,                         | V279, P278, H303, W284, T301, Q401, K281, L 398, L 402      |
| Leishmania    | I11, L14, Q8, T94, I95                                      | I 95, 119, L368, 371, I 370, I18, T21           | E398, M395, T298, A297, M296, P295, K 278, W286, V276, T298 |
| Entamoeba     | E452, K469, D470, L453, E420, S419, R 455, N421, K422       | I30, W35, A33, L29, V 389, L29, V389, L 387     | K377, P 335, E 312, P 339, S308, D310, F340, N309, W311     |
